# Supplementary material for: Mitochondrial complex I bridges a connection between regulation of carbon flexibility and gastrointestinal commensalism in the human fungal pathogen Candida albicans
Source: PLoS Pathog. 2017 Jun 1;13(6):e1006414. doi: 10.1371/journal.ppat.1006414 (PMC5469625; doi:10.1371/journal.ppat.1006414)
Supplement: S1 Table — (XLSX) [file ppat.1006414.s027.xlsx]

## Sheet: Sheet1
S1 Table. Strains used in this study
Strain	Relevant Genotype	Full Genotype	Reference
SN250	Wild type	leu2Δ::C.m.LEU2/leu2Δ::C.d.HIS1, his1Δ/his1Δ, arg4Δ/arg4Δ, leu2D/leu2Δ ura3Δ/URA3, iro1Δ/IRO1	Noble et al., 2010
CB151	Brg1-Myc/BRG1	BRG1-13xMyc/BRG1, leu2Δ::C.m.LEU2/leu2Δ::C.d.HIS1, his1Δ/his1Δ, arg4Δ/arg4Δ, leu2D/leu2Δ ura3Δ/URA3, iro1Δ/IRO1	this study
CB342	nuo2∆∆	nuo2Δ::C.m.LEU2/nuo2Δ::C.d.HIS1, his1Δ/his1Δ, arg4Δ/arg4Δ, leu2Δ/leu2Δ, ura3Δ/URA3, iro1Δ/IRO1	this study
CB343	nuo1∆∆	nuo1∆::C.m.LEU2/ nuo1∆::C.d.HIS1, his1Δ/his1Δ, arg4Δ/arg4Δ, leu2Δ/leu2Δ, ura3Δ/URA3, iro1Δ/IRO1	this study
CB344	orf19.2570∆∆	orf19.2570∆::C.m.LEU2/ orf19.2570∆::C.d.HIS1, his1Δ/his1Δ, arg4Δ/arg4Δ, leu2Δ/leu2Δ, ura3Δ/URA3, iro1Δ/IRO1	this study
CB345	orf19.1625∆∆	orf19.1625∆::C.m.LEU2/ orf19.1625∆::C.d.HIS1, his1Δ/his1Δ, arg4Δ/arg4Δ, leu2Δ/leu2Δ, ura3Δ/URA3, iro1Δ/IRO1	this study
CB346	NUO2-complemented strain	arg4Δ/arg4Δ, leu2Δ/leu2Δ::NUO2::C.d.ARG4, his1Δ/his1Δ, ura3Δ/URA3, iro1Δ/IRO1, sef1Δ:::C.d.HIS1/sef1Δ:::C.m.LEU2	this study
CB347	NUO1-complemented strain	arg4Δ/arg4Δ, leu2Δ/leu2Δ::NUO1::C.d.ARG4, his1Δ/his1Δ, ura3Δ/URA3, iro1Δ/IRO1, sef1Δ:::C.d.HIS1/sef1Δ:::C.m.LEU2	this study
CB348	orf19.2570-complemented strain	arg4Δ/arg4Δ, leu2Δ/leu2Δ::orf19.2570::C.d.ARG4, his1Δ/his1Δ, ura3Δ/URA3, iro1Δ/IRO1, sef1Δ:::C.d.HIS1/sef1Δ:::C.m.LEU2	this study
CB349	orf19.1625-complemented strain	arg4Δ/arg4Δ, leu2Δ/leu2Δ::orf19.1625::C.d.ARG4, his1Δ/his1Δ, ura3Δ/URA3, iro1Δ/IRO1, sef1Δ:::C.d.HIS1/sef1Δ:::C.m.LEU2	this study
CB350	Brg1-Myc/BRG1, nuo2∆∆	BRG1-13xMyc-FLP-SAT1/BRG1, his1Δ/his1Δ, nuo2 Δ::C.m.LEU2/nuo2Δ::C.d.HIS1, arg4Δ/arg4Δ, leu2Δ/leu2Δ, ura3Δ/URA3, iro1Δ/IRO	this study
CB351	BRG1OE/BRG1, nuo2∆∆	BRG1::NAT1-TDH3p-BRG1/BRG1, nuo2Δ::C.m.LEU2/nuo2Δ::C.d.HIS1, his1Δ/his1Δ, arg4Δ/arg4Δ, leu2Δ/leu2Δ, ura3Δ/URA3, iro1Δ/IRO1	this study
